# 1 **Protein composition of the occlusion bodies of** 2 ***Epinotia aporema* granulovirus**

3

4 Tomás Masson, María Laura Fabre, María Leticia Ferrelli, Matías Luis  
5 Pidre, Víctor Romanowski.

6 1 Instituto de Biotecnología y Biología Molecular (IBBM, UNLP-  
7 CONICET), Facultad de Ciencias Exactas, Universidad Nacional de La  
8 Plata, La Plata, Buenos Aires, Argentina.

9

## 10 **Abstract**

11 Within family *Baculoviridae*, members of the *Betabaculovirus* genus  
12 are employed as biocontrol agents against lepidopteran pests, either  
13 alone or in combination with selected members of the  
14 *Alphabaculovirus* genus. *Epinotia aporema* granulovirus (EpapGV) is a  
15 fast killing betabaculovirus that infects the bean shoot borer (*E.*  
16 *aporema*) and is a promising biopesticide. Because occlusion bodies  
17 (OBs) play a key role in baculovirus horizontal transmission, we  
18 investigated the composition of EpapGV OBs. Using mass  
19 spectrometry-based proteomics we could identify 56 proteins that are  
20 included in the OBs during the final stages of larval infection. Our data  
21 provides experimental validation of several annotated hypothetical  
22 coding sequences. Proteogenomic mapping against genomic  
23 sequence detected a previously unannotated *ac110*-like core gene  
24 and a putative translation fusion product of ORFs *epap48* and *epap49*.  
25 Comparative studies of the proteomes available for the family  
26 *Baculoviridae* highlight the conservation of core gene products as  
27 parts of the occluded virion. Two proteins specific for  
28 betabaculoviruses (Epap48 and Epap95) are incorporated into OBs.

29 Moreover, quantification based on emPAI values showed that Epap95  
30 is one of the most abundant components of EpapGV OBs.

31

## 32 **Introduction**

33 The family *Baculoviridae* comprises a diverse group of large double  
34 stranded DNA viruses that infect larvae of the insect orders  
35 *Lepidoptera*, *Hymenoptera* and *Diptera* [1]. Baculovirus have a rod  
36 shaped, enveloped virion with a circular genome ranging from 80 to  
37 180 kbp [2]. Virions are found in the environment embedded in a  
38 proteinaceous matrix that forms occlusion bodies (OBs), a phenotype  
39 that is resistant to desiccation and UV radiation. OBs on leaves that  
40 are consumed by foraging larvae reach the midgut and, after being  
41 dissolved at high pH, release the occlusion derived viruses (ODVs),  
42 which initiate infection of the epithelial cells. These infected cells  
43 produce budded viruses (BVs) that disseminate the infection  
44 systemically [3]. Based on OBs morphology, baculoviruses were first  
45 classified in two groups: Nucleopolyhedrovirus (NPV) and Granulovirus  
46 (GV) [1]. Later, they were taxonomically divided into four genera:  
47 *Alphabaculovirus* (lepidopteran-specific NPV), *Betabaculovirus*  
48 (lepidopteran-specific GV), *Gammabaculovirus* (hymenopteran-  
49 specific NPV) and *Deltabaculovirus* (dipteran-specific NPV) [1].  
50 Among different entomopathogenic viruses, the baculoviruses have  
51 received most of the attention due to their narrow host range which  
52 makes them safe pesticides. The majority of commercial products are  
53 based on virus isolates that belong to the genera *Alphabaculovirus*  
54 and *Betabaculovirus* [4]. The bean shoot borer (*Epinotia aporema*) is  
55 an oligophagous pest that attacks soybean crops [5]. A

56 poliorganotropic fast killing betabaculovirus for this species, *Epinotia*  
57 *aporema* granulovirus (EpapGV), has been discovered and sequenced  
58 by our group [6, 7]. In order to improve our understanding of the  
59 infectious process we set out to analyze the protein content of  
60 EpapGV OB using a proteomic approach.

61 Mass spectrometry-based (MS) proteomics represents a powerful  
62 technique to interrogate the structural landscape of viral particles [8].  
63 In addition to direct protein identification, spectral data derived from  
64 proteomic experiments can be used to identify novel features within  
65 genomic and transcriptomic datasets. This proteogenomic  
66 methodology is independent of reference annotation, thus providing  
67 excellent means for the refinement of gene models and the discovery  
68 of novel protein coding sequences [9].

69 Virion proteomics has been applied to study several DNA virus  
70 families (*Ascoviridae* [10], *Herpesviridae* [11], *Iridoviridae* [12],  
71 *Nudiviridae* [13] and *Poxviridae* [14]). In relation with the present  
72 study, eight ODV proteomes of baculoviruses have been analyzed  
73 (AcMNPV [15], AgMNPV [16], ChchNPV [17], HearNPV [18], MabrNPV  
74 [19], ClanGV [20], PiraGV [21] and CuniNPV [22]). These datasets  
75 point at a complex virion comprising a large number of proteins  
76 involved in virion morphogenesis, OBs formation and infection of  
77 insect midgut epithelial cells.

78 In this work we examined the protein content of EpapGV OBs using  
79 MS-based shotgun proteomics in order to describe the composition of  
80 this virion phenotype. A total of 56 viral proteins from EpapGV OBs  
81 were identified, the majority of which are conserved components  
82 among the members of the family *Baculoviridae* and few are  
83 betabaculovirus-specific proteins. Comparative proteomics of

84 baculovirus showed a set of core gene products present in the  
85 majority of proteomes analyzed.

86

## 87 **Materials and Methods**

### 88 *Larvae and virus*

89 Larvae of the bean shoot borer (*Epinotia aporema*), were collected  
90 from field in the experimental station of the Instituto Nacional de  
91 Tecnología Agropecuaria (INTA) and reared in our laboratory with an  
92 artificial diet and controlled light cycle (16 hours of light). The strain  
93 used in this study was EpapGV (Refseq ID NC\_018875), collected in  
94 Oliveros (Santa Fe, Argentina) [6].

95

### 96 *Occlusion bodies (OBs) production and purification*

97 Fourth instar *E. aporema* larvae were infected *per os* using artificial  
98 diet contaminated with a solution containing EpapGV OBs. Dying  
99 larvae with signs of infection were stored and processed as described  
100 previously [7]. Briefly, infected larvae were stored in distilled water  
101 and later homogenized in a Dounce homogenizer. The resulting  
102 solution was filtered through three layers of cheesecloth to eliminate  
103 insoluble insect debris. This extract was clarified by three steps of  
104 centrifugation at 10000 x g for 10 minutes followed by a wash with  
105 0.05% v/v SDS solution. Clarified solution was subjected to  
106 ultracentrifugation in a continuous 30-60% w/w sucrose gradient  
107 (50000 x g, one hour, 4°C, Beckman SW 41 Ti rotor). The  
108 whitish/opalescent band corresponding to OBs was collected, diluted  
109 10-fold in distilled water and pelleted by centrifugation at 14000 x g  
110 for 10 minutes. The final pellet was resuspended in distilled water and

111 stored frozen at -20°C. Two biological independent samples were  
112 processed. Total protein mass in the sample was quantified using the  
113 Bradford assay [23].

114

#### 115 *Mass spectrometry analysis*

116 Protein digestion and analysis were performed at the Proteomics Core  
117 Facility CEQUIBIEM, at the University of Buenos Aires/CONICET  
118 (National Research Council) as follows: protein samples were reduced  
119 with 10 mM dithiothreitol in 50 mM ammonium bicarbonate pH 8 (45  
120 min, 56°C) and carbamidomethylated with 20 mM iodoacetamide in  
121 the same solvent (40 min, room temperature, in darkness). This  
122 protein solution was precipitated with 0.2 volumes of 100% w/v  
123 trichloroacetic acid (Sigma) at -20 °C for at least two hours and  
124 centrifuged at 12000 x g for 10 min (4°C). The pellet was washed  
125 twice with ice-cold acetone and dried at room temperature. Proteins  
126 were resuspended in 50 mM ammonium bicarbonate pH 8 and  
127 digested with trypsin (Promega V5111). The resulting peptides were  
128 desalted with ZipTip C18 columns (Millipore).

129 The digests were analyzed by nanoLC-MS/MS in a Thermo Scientific Q  
130 Exactive Mass Spectrometer coupled to a nanoHPLC EASY-nLC 1000  
131 (Thermo Scientific). For the LC-MS/MS analysis, approximately 1 µg of  
132 peptides was loaded onto the column and eluted for 120 minutes  
133 using a reverse phase column (C18, 2 µm x 10 nm particle size, 50  
134 µm x 150 mm) Easy-Spray Column PepMap RSLC (P/N ES801) suitable  
135 for separating complex mixtures of peptides with a high degree of  
136 resolution. The flow rate used for the nano-column was 300 nL min<sup>-1</sup>  
137 and the solvent range from 7% B (5 min) to 35% B (120 min). Solvent  
138 A was 0.1% formic acid in water whereas B was 0.1% formic acid in

139 acetonitrile. The injection volume was 2  $\mu$ L. The MS equipment has a  
140 high collision dissociation cell (HCD) for fragmentation and an  
141 Orbitrap analyzer (Thermo Scientific, Q-Exactive). A voltage of 3.5 kV  
142 was used for Electro Spray Ionization (Thermo Scientific, EASY-  
143 SPRAY).  
144 XCalibur 3.0.63 (Thermo Scientific) software was used for data  
145 acquisition and equipment configuration that allows peptide  
146 identification at the same time of their chromatographic separation.  
147 Full-scan mass spectra were acquired in the Orbitrap analyzer. The  
148 scanned mass range was 400-1800 m/z, at a resolution of 70000 at  
149 400 m/z and the 12 most intense ions in each cycle, were sequentially  
150 isolated, fragmented by HCD and measured in the Orbitrap analyzer.  
151 Peptides with a charge of +1 or with unassigned charge state were  
152 excluded from fragmentation for MS2.

153

#### 154 *Analysis of MS data*

155 Q Exactive raw data was processed using Proteome Discoverer<sup>TM</sup>  
156 software (version 2.1.1.21, Thermo Scientific) and searched against  
157 EpapGV protein database downloaded from NCBI (accession number  
158 NC\_018875, National Center for Biotechnology Information;  
159 [www.ncbi.nlm.nih.gov](http://www.ncbi.nlm.nih.gov)) digested with trypsin with a maximum of one  
160 missed cleavage per peptide. Proteome Discoverer<sup>TM</sup> searches were  
161 performed with a precursor mass tolerance of 10 ppm and product ion  
162 tolerance of 0.05 Da. Static modifications were set to  
163 carbamidomethylation of Cys, and dynamic modifications were set to  
164 oxidation of Met and N-terminal acetylation. Protein hits were filtered  
165 for high confidence peptide matches with a maximum protein and  
166 peptide false discovery rate of 1% calculated using a reverse

167 database strategy. The exponentially modified protein abundance  
168 index (emPAI) was calculated automatically by Proteome Discoverer™  
169 software and used to estimate the relative abundance of identified  
170 proteins within the sample.

171

### 172 *Non annotated peptides search*

173 The complete genome sequence of EpapGV was translated *in silico* in  
174 all six frames using the Mascot search software. Spectral data was  
175 searched and all peptides hits were filtered to discard matches in  
176 previously annotated ORFs. The remaining peptides were mapped to  
177 the corresponding genomic position. Search for putative unannotated  
178 ORFs was done extending peptide hits until a stop codon was found at  
179 C-terminus, and a start or stop codon for the N-terminus. Homologous  
180 sequences were searched using the TBLASTN tool against all  
181 baculovirus genomes.

182

### 183 *Orthologs clustering*

184 A database comprising all the ODV proteins detected in baculoviruses  
185 was generated using previous proteomic data sets [15-22]. The  
186 software BLASTP [24] and HHMER [25] were used to identify groups of  
187 orthologous proteins (orthogroups) among different proteomes by  
188 reciprocal best hits.

189

## 190 **Results**

### 191 *Structural components of the EpapGV OB*

192 We determined the composition of purified EpapGV OBs employing a  
193 shotgun proteomic approach. The peptide mixture was separated by

194 liquid chromatography and analyzed with tandem mass spectrometry  
 195 (LC-MS/MS). This approach was used to avoid protein loss associated  
 196 with SDS-PAGE gel extraction. We detected 56 proteins in our purified  
 197 EpapGV OBs samples. Genes encoding these proteins comprise  
 198 43.93% of EpapGV total number of annotated ORFs (Fig 1), showing  
 199 that a large part of the viral genome codes for structural proteins. A  
 200 total of 10 proteins (Epap10, Epap62, Epap71, Epap123, LEF6, P6.9,  
 201 Hel-1, P18, DNA Polymerase and DNA Ligase) were detected with only  
 202 a single peptide, which might be related to low molar proportions of  
 203 these polypeptides in the sample (Table 1). As additional evidence for  
 204 the identification of these proteins, we checked the presence of  
 205 several ion products belonging to the theoretical *b* and *y* spectral ions  
 206 series for these peptides. The full list of proteins is shown in Table 1.  
 207 In our samples we were unable to detect PIF3 and desmoplakin, two  
 208 core gene products which have been confirmed in other virions by MS  
 209 and western blot [15]. This could be attributed to proteolytic  
 210 degradation, low protein level or deficient ionization of these proteins  
 211 in our samples.

212

213 **Table 1. Proteins detected in EpapGV OBs**

| ORF | Protein        | NCBI Protein Id. | Size (aa) | % Coverage | # Peptides | emPAI   | % emPAI |
|-----|----------------|------------------|-----------|------------|------------|---------|---------|
| 1   | Granulin       | YP_006908509.1   | 248       | 60,48      | 25         | 1995261 | 857918  |
| 5   | P78/83         | YP_006908513.1   | 137       | 16,06      | 2          | 0,33    | 0,14    |
| 6   | PK1            | YP_006908514.1   | 276       | 30,43      | 9          | 3,44    | 1,48    |
| 10  | Epap10         | YP_006908518.1   | 90        | 23,33      | 1          | 0,33    | 0,14    |
| 14  | EFP            | YP_006908522.1   | 541       | 5,18       | 1          | 0,08    | 0,03    |
| 21  | PEP2           | YP_006908529.1   | 142       | 45,07      | 5          | 4,62    | 1,99    |
| 22  | PEP/P10        | YP_006908530.1   | 308       | 48,70      | 8          | 9       | 3,87    |
| 25  | PEP1           | YP_006908533.1   | 178       | 37,64      | 6          | 5,31    | 2,28    |
| 27  | <b>PIF5</b>    | YP_006908535.1   | 354       | 31,07      | 7          | 5,58    | 2,40    |
| 28  | <b>Ac142</b>   | YP_006908536.1   | 457       | 44,86      | 18         | 4,84    | 2,08    |
| 29  | <b>ODV-E18</b> | YP_006908537.1   | 88        | 45,45      | 6          | 176,83  | 76,03   |
| 31  | v-Cath         | YP_006908539.1   | 329       | 5,77       | 2          | 0,29    | 0,12    |
| 39  | ODV-E66        | YP_006908547.1   | 654       | 33,64      | 14         | 5,31    | 2,28    |

|     |                 |                |      |       |    |        |        |
|-----|-----------------|----------------|------|-------|----|--------|--------|
| 40  | Epap40          | YP_006908548.1 | 102  | 75,49 | 6  | 16,78  | 7,22   |
| 47  | <b>PIF2</b>     | YP_006908555.1 | 374  | 20,05 | 7  | 0,69   | 0,30   |
| 48  | Epap48          | YP_006908556.1 | 446  | 37,67 | 13 | 2,54   | 1,09   |
| 49  | Epap49          | YP_006908557.1 | 1465 | 29,83 | 35 | 2,88   | 1,24   |
| 52  | v-Ubi           | YP_006908560.1 | 93   | 33,33 | 3  | 1,37   | 0,59   |
| 53  | <b>ODV-EC43</b> | YP_006908561.1 | 348  | 47,41 | 12 | 6,20   | 2,67   |
| 58  | SOD             | YP_006908566.1 | 183  | 55,19 | 9  | 24,12  | 10,37  |
| 59  | <b>PIF0</b>     | YP_006908567.1 | 653  | 11,02 | 5  | 0,47   | 0,20   |
| 62  | Epap62          | YP_006908570.1 | 106  | 10,38 | 1  | 0,39   | 0,17   |
| 66  | P24             | YP_006908574.1 | 165  | 27,88 | 3  | 0,87   | 0,37   |
| 69  | <b>PIF1</b>     | YP_006908577.1 | 538  | 7,99  | 3  | 0,52   | 0,22   |
| 71  | Epap71          | YP_006908579.1 | 104  | 6,73  | 1  | 0,47   | 0,20   |
| 74  | LEF6            | YP_006908582.1 | 82   | 12,19 | 1  | 0,47   | 0,20   |
| 78  | <b>P48/45</b>   | YP_006908586.1 | 380  | 6,58  | 2  | 0,10   | 0,04   |
| 79  | P12             | YP_006908587.1 | 115  | 38,26 | 3  | 4,62   | 1,99   |
| 80  | <b>P40</b>      | YP_006908588.1 | 373  | 25,20 | 9  | 1,68   | 0,72   |
| 81  | <b>P6.9</b>     | YP_006908589.1 | 56   | 14,29 | 1  | 2,16   | 0,93   |
| 83  | <b>38K</b>      | YP_006908591.1 | 295  | 26,44 | 5  | 1,45   | 0,62   |
| 84  | <b>PIF4</b>     | YP_006908592.1 | 162  | 20,99 | 3  | 0,67   | 0,29   |
| 85  | <b>Hel-1</b>    | YP_006908593.1 | 1085 | 1,29  | 1  | 0      | 0,00   |
| 86  | <b>ODV-E25</b>  | YP_006908594.1 | 213  | 43,19 | 7  | 9      | 3,87   |
| 87  | <b>P18</b>      | YP_006908595.1 | 158  | 5,06  | 1  | 0      | 0,00   |
| 88  | <b>P33</b>      | YP_006908596.1 | 254  | 36,61 | 7  | 1,98   | 0,85   |
| 90  | ChaB            | YP_006908598.1 | 75   | 45,33 | 2  | 2,98   | 1,28   |
| 92  | <b>VP39</b>     | YP_006908600.1 | 293  | 75,43 | 21 | 232,27 | 100,00 |
| 93  | <b>ODV-EC27</b> | YP_006908601.1 | 284  | 24,65 | 8  | 3,39   | 1,46   |
| 94  | BRO             | YP_006908602.1 | 359  | 5,85  | 2  | 0,23   | 0,10   |
| 95  | Epap95          | YP_006908603.1 | 73   | 69,86 | 5  | 176,83 | 76,03  |
| 96  | <b>PIF8</b>     | YP_006908604.1 | 567  | 14,10 | 7  | 1,22   | 0,52   |
| 98  | <b>Ac81</b>     | YP_006908606.1 | 191  | 23,04 | 5  | 1,61   | 0,69   |
| 99  | <b>GP41</b>     | YP_006908607.1 | 286  | 74,82 | 23 | 87,59  | 37,66  |
| 100 | <b>Ac78</b>     | YP_006908608.1 | 88   | 44,32 | 2  | 16,78  | 7,22   |
| 101 | <b>VLF-1</b>    | YP_006908609.1 | 368  | 35,87 | 11 | 3,06   | 1,32   |
| 103 | Ac75            | YP_006908611.1 | 149  | 56,38 | 9  | 7,11   | 3,06   |
| 106 | <b>DNA Pol</b>  | YP_006908614.1 | 1068 | 2,72  | 1  | 0      | 0,00   |
| 109 | <b>PIF6</b>     | YP_006908617.1 | 148  | 41,22 | 5  | 2,59   | 1,11   |
| 113 | FP25K           | YP_006908621.1 | 146  | 19,86 | 3  | 0,23   | 0,10   |
| 115 | DNA Lig         | YP_006908623.1 | 534  | 4,87  | 1  | 0,08   | 0,03   |
| 123 | Epap123         | YP_006908630.1 | 102  | 6,87  | 1  | 0,47   | 0,20   |
| 126 | Epap126         | YP_006908633.1 | 347  | 45,82 | 11 | 3,49   | 1,50   |
| 127 | Epap127         | YP_006908634.1 | 69   | 30,43 | 2  | 1,15   | 0,49   |
| 129 | <b>VP1054</b>   | YP_006908636.1 | 344  | 11,05 | 2  | 0,1    | 0,04   |
| 133 | ME53            | YP_006908640.1 | 373  | 9,91  | 2  | 0,22   | 0,09   |
| -   | <b>Ac110</b>    | This study     | 47   | 29.79 | 1  | -      | -      |

214 % Coverage: percentage of the protein sequence covered by identified  
215 peptides.

216 emPAI: exponentially modified Protein Abundance Index.

217 ORF: Open Reading Frame, as numbered in EpapGV genome map published  
218 by Ferrelli *et al* [7].

219 # Peptides: number of individual peptides identified for each protein

220 Core gene products are in bold characters.

221

222 In addition to identifying the components of the OBs, we estimated  
223 the relative abundance of each protein; to this end we calculated the  
224 emPAI value proposed by Ishihama *et al* [26] for each protein. The  
225 emPAI value for the major capsid protein VP39 was used to normalize  
226 protein abundance (Table 1). Taking a cutoff value of at least 10 %  
227 VP39 emPAI, the most abundant proteins are GP41, Granulin, ODV-  
228 E18, SOD and Epap95, together with VP39. The major capsid  
229 component VP39, the tegument protein GP41 and the major  
230 component of OB matrix granulin were expected to be among the  
231 most abundant proteins due to their known structural function. ODV-  
232 E18 ortholog in AcMNPV is an essential protein for BV production that  
233 also localizes to the ODV membrane [27]. Cu-Zn superoxide  
234 dismutase (SOD) activity in virion preparations of Chlorovirus PBCV-1  
235 has been recently associated with reactive oxygen species reduction  
236 during the early stages of virus infection [28]. Finally, Epap95 a  
237 protein with orthologs in all the members of the genus  
238 *Betabaculovirus*, has been consistently detected in the granuloviruses  
239 of *Clostera anachoreta* (ClanGV) and *Pieris rapae* (PiraGV) as a  
240 component within ODVs.

241 Betabaculovirus gene content remains poorly characterized, with a  
242 large number of hypothetical genes predicted by phylogenomics  
243 methods. Some of these genes lack *bona fide* experimental evidence  
244 to confirm the actual existence of their putative protein products. Our  
245 proteomic data confirmed the presence of translation products for 10  
246 hypothetical proteins annotated in the genome of EpapGV, namely,

247 Epap10, Epap40, Epap48, Epap49, Epap62, Epap71, Epap95,

248 Epap123, Epap126 and Epap127.

249

250 *Short peptides encoded in EpapGV genome that do not belong to*

251 *annotated ORFs*

252 To identify possible unannotated proteins, we searched our spectral

253 data against a theoretical database comprising all translation

254 products predicted in the six reading frames of EpapGV genome

255 sequence (we included all possible ORFs, without introducing a

256 minimal size criterion). We detected seven peptides that mapped to

257 the EpapGV genome but did not belong to the set of annotated ORFs

258 [7]. Their sequence and genomic location are detailed in S1 Appendix.

259 One of these peptides matches an unannotated 47 amino acids long

260 ORF overlapping *epap51* but in the opposite orientation. We further

261 examined the presence of this novel ORF in other members of the

262 family *Baculoviridae* and found that it is an ortholog of the core gene

263 *ac110* [29]. This gene has been described as the *per os* infectivity

264 factor 7 (*pif7*) and its product has only been detected in the proteome

265 of HearNPV ODV [18] and EpapGV (this study). Genomic localization

266 and orientation of this *ac110*-like gene is conserved within

267 *Betabaculovirus*, providing additional evidence about its evolutionary

268 conservation.

269 The remaining six peptides overlap with annotated ORFs (*chitinase*,

270 *dna ligase* and *granulin*) or intergenic regions. Two peptides were

271 found between ORFs *epap48* and *epap49* and one peptide between

272 *epap61* and *epap62*. TBLASTN was used to find putative homologous

273 unannotated peptides in other baculovirus genomes. Only the

274 peptides overlapping with *chitinase* and *granulin* are conserved in  
275 homologous *loci* in GV and NPV genomes (S1 Appendix).  
276 Remarkably, peptides between *epap48* and *epap49* almost cover the  
277 entire 145 bp intergenic sequence (Fig 2). *Epap48* encodes a 446  
278 amino acid long protein that is conserved in the betabaculoviruses.  
279 The putative translation product of *epap49* is a large protein  
280 composed of 1465 residues with no orthologs detected in other  
281 baculoviruses. Mapped peptides are located in the same reading  
282 frame as the translation product of *epap49*, but no methionine codon  
283 has been found in frame (Fig 2). One hypothesis that could explain  
284 the presence of these peptides is that *Epap48* and *Epap49* may be  
285 expressed as a fusion protein due to a putative +1 frameshifting  
286 event near the C-terminus of *Epap48*; further experimental validation  
287 of this potential fusion protein will be needed to confirm this  
288 hypothesis.

289

### 290 *Conservation of structural proteins in the family Baculoviridae*

291 The reports of ODV proteomes belonging to several baculoviruses  
292 were used to evaluate the conservation of the viral particle  
293 composition in this family. To date, eight proteomic studies were  
294 carried out on ODV, including five members of the genus  
295 *Alphabaculovirus* (*AcMNPV*, *AgMNPV*, *ChchNPV*, *MabrNPV* and  
296 *HearNPV*), two of the genus *Betabaculovirus* (*ClanGV* and *PiraGV*) and  
297 one of *Deltabaculovirus* (*CuniNPV*). Our study expands this data with  
298 the proteins present in the *EpapGV* OBs. Sequences of proteins  
299 detected in occluded virions of baculovirus were used to construct  
300 groups of orthologous proteins (S1 Table). For each of these  
301 orthogroups we scored the number of proteomes in which they are

302 present as a measure of their conservation. We assigned them a class  
303 based in the phylogenetic conservation of their coding sequence  
304 (core, lepidopteran-specific, genus-specific and virus specific) (Fig  
305 3A). Most conserved protein groups (present in a larger number of  
306 proteomes) are enriched in core and lepidopteran-specific gene  
307 products. In contrast, proteins specific to a small set of proteomes are  
308 encoded by genus-specific and virus-specific genes.

309 The betabaculovirus proteomes (EpapGV, ClanGV and PiraGV) were  
310 compared using a Venn diagram (Fig 3B). From the proteins present  
311 in all three viruses, BRO, Epap48, Epap95 and Epap126 are the only  
312 orthogroups without functional characterization. Interestingly, Epap95  
313 is one of the most abundant proteins according to emPAI values.  
314 Additionally, Epap126 is shared between group II alphabaculoviruses  
315 and betabaculoviruses (except for ClanGV) (S1 Table). On the other  
316 hand, Epap10, Epap49 and Epap62 are proteins unique to EpapGV  
317 OBs. Remarkably, *epap10* orthologs are encoded only in five  
318 alphabaculoviruses that infect insects of the family *Tortricidae*,  
319 *Choristoneura fumiferana* NPV, *Choristoneura occidentalis* NPV,  
320 *Choristoneura rosaceana* NPV, *Cryptophlebia peltastica* NPV and  
321 *Epiphyas postvittana* NPV. This could be the product of an ancestral  
322 horizontal gene transfer between alphabaculoviruses and  
323 betabaculoviruses that coinfecting the same host, based on gene  
324 conservation evidence.

325

## 326 **Discussion**

327 Occluded virions are responsible for baculovirus primary infection.  
328 Proteome of OBs is related with oral infectivity, providing relevant

329 information about conserved components potentially associated with  
330 midgut infection. Until now, the proteomes of ClanGV and PiraGV  
331 ODVs have been interrogated using MS-based techniques [20, 21].  
332 These viral species are phylogenetically distant to EpapGV [7]. We  
333 explored possible divergence in protein composition employing a  
334 bottom-up proteomic approach to characterize the protein content of  
335 EpapGV OBs. A diagram of the EpapGV virion particle summarizing  
336 qualitative and semi-quantitative composition is shown in Fig 4. Virion  
337 components can be grouped in five classes based in their localization:  
338 18 nucleocapsid proteins, 15 ODV envelope proteins, 5 occlusion  
339 matrix proteins, 1 tegument protein and 17 proteins of undefined  
340 localization. Comparisons across virion proteomes available for  
341 members of the family *Baculoviridae* highlighted the conservation of  
342 several structural components forming the mature virion. On the  
343 other hand, comparative genomics highlight the conservation of a  
344 collinear genomic region for lepidopteran-infecting baculoviruses [30].  
345 Combined genomics and proteomics information suggests that this  
346 *locus*, compared to the rest of genome, is densely populated by  
347 protein coding sequences corresponding predominantly to structural  
348 polypeptides (Fig 1 and S1 Fig). Intriguingly, the product of the core  
349 gene desmoplakin could not be detected in the betabaculovirus  
350 structural proteomes but it has been reported for alphabaculoviruses;  
351 we do not know if this is related to a different localization of this  
352 protein within betabaculovirus or due to technical reasons. In  
353 AcMNPV, desmoplakin has been implied in the segregation of  
354 nucleocapsids destined to build BV (which are ubiquitinated) and ODV  
355 (non ubiquitinated) [31].

356 It has been previously reported that proteins related to viral DNA  
357 metabolism and DNA binding capacity may be retained in the virion  
358 [15]. In the present study we could identify the DNA polymerase, DNA  
359 ligase and Helicase-1 in OBs. For other baculoviruses IE1, Alk-Exo,  
360 LEF1 and LEF3 have been detected also. This reinforces the idea that  
361 the viral DNA is associated with various proteins (in addition to the  
362 major condensing protein P6.9) inside the viral capsid.

363 The envelope that surrounds the ODV morphotype is especially  
364 adapted for primary infection of the insect midgut and presents a  
365 complex complement of proteins. These can be classified in two  
366 functional groups, those required for virion envelopment and those  
367 related with oral infectivity. Envelope morphogenesis begins with the  
368 formation of intranuclear microvesicles (IMV) derived from the inner  
369 nuclear membrane and the association with viral capsids. The ODV  
370 membrane proteins Ac75 and P18 are necessary for the generation of  
371 these IMV [32, 33]. Subsequently, envelopment of assembled  
372 nucleocapsids requires the ODV proteins Ac78, Ac81, Ac142, ODV-  
373 E25, ODV-EC43, P33 and P48 to form mature OBs [34-40] . On the  
374 other hand, several ODV membrane proteins are members of the PIF  
375 complex (PIF0, PIF1, PIF2, PIF3, PIF4, PIF5, PIF6 and PIF8); this  
376 molecular complex is the main effector of oral infection in the insect  
377 midgut. These proteins are encoded by core genes conserved in all  
378 the members of the *Baculoviridae* family [41].

379 The biological relevance of the betabaculovirus-specific orthogroups  
380 Epap48 and Epap95 within OBs is currently unknown. Moreover, the  
381 high content of Epap95 in the OBs may also be biologically relevant.  
382 On the other hand, Epap126 orthogroup is present in group II

383 alphabaculoviruses and betabaculoviruses, which represents a  
384 conserved protein potentially involved in oral infection.

385 Baculovirus genomes are densely populated with coding sequences  
386 (overlapping in several cases) and contain short intergenic regions  
387 [2]. A recent study has described the transcriptional landscape of  
388 baculovirus infection, demonstrating the existence of several  
389 polycistronic and overlapping viral transcripts [42]. Together with  
390 other technologies, proteogenomic mapping is a valuable tool to  
391 improve the annotation of these complex coding regions. This  
392 approach has been used in proteome research for several virus  
393 families [43], but was applied only for one baculovirus, AgMNPV [44].  
394 We identified seven peptides that do not map to previously annotated  
395 coding regions. One of these peptides turned to be an ortholog of  
396 *ac110*; this ORFs overlapped with the coding sequence of *epap51*.  
397 Moreover, the presence of peptides derived from alternative frames  
398 inside the coding regions of *granulin* and *chitinase* raises the question  
399 about the underlying complexity of baculovirus transcription and  
400 translation processes.

401 Surprisingly, two unmapped peptides were found to be encoded in the  
402 intergenic region of *epap48* and *epap49* and suggest the presence of  
403 a putative fusion product between these proteins. Epap49 is the  
404 largest protein annotated in EpapGV genome; it is 1465 amino acids  
405 long. As previously reported, it was difficult to annotate this as a  
406 hypothetical protein due to its atypically large size, absence of  
407 homologous proteins in Genbank and lack of known promoter motifs  
408 [7]. Also, it was noted that large proteins were coded in similar  
409 locations in the genomes of ChocGV and HearGV, 1144 and 1279

410 amino acids long, respectively [45, 46]. In the case of ChocGV it was  
411 not annotated in the genome [45] and in HearGV it was found to be a  
412 fusion of ORFs homologous to XecnGV 47 and 48 [46]. In this study,  
413 we found evidence that Epap49 is actually translated.

414

## 415 **Conclusion**

416 The protein composition of EpapGV OBs was interrogated using an  
417 MS-based proteomic approach. A total of 56 proteins have been  
418 detected in the EpapGV occluded virion, suggesting the presence of a  
419 highly conserved protein profile in baculoviral OBs. We identified  
420 Epap95, a betabaculovirus-specific protein, as a highly abundant  
421 capsid component. This protein represents an interesting candidate  
422 for further functional studies to explore its role in betabaculovirus  
423 pathogenesis. Through proteogenomic search we could detect a non-  
424 annotated coding region with a high degree of sequence identity to  
425 *ac110*. In addition, our data strongly suggest the translation of a  
426 putative fusion protein involving Epap48 and Epap49. Our study  
427 highlight the usefulness of MS proteomics to characterize the protein  
428 complement of the viral particle and the possibility to improve  
429 genome annotation through experimental evidence for translation of  
430 predicted coding regions.

431

## 432 **Acknowledgements**

433 The authors thank Dr. Silvia Margarita Moreno and Dr. María Pía  
434 Valacco, from the Centro de Estudios Químicos y Biológicos por  
435 Espectrometría de Masas (CEQUIBIEM-CONICET-FCEN-UBA), for their  
436 help with sample preparation protocols, data acquisition and

437 subsequent analysis. This work was supported by grants from the  
438 Agencia Nacional de Promoción Científica y Tecnológica (ANPCyT) and  
439 UNLP to Víctor Romanowski.

## 440 References

- 441 1. Harrison RL, Herniou EA, Jehle JA, Theilmann DA, Burand JP, Becnel  
442 JJ, et al. ICTV Virus Taxonomy Profile: Baculoviridae. *Journal of*  
443 *General Virology*. 2018;99(9):1185-1186. pmid: 29947603.
- 444 2. van Oers MM, Vlak JM. Baculovirus genomics. *Curr Drug Targets*.  
445 2007;8(10), 1051-68. pmid: 17979665
- 446 3. Passarelli AL. Barriers to success: how baculoviruses establish  
447 efficient systemic infections. *Virology*. 2011;411(2):383-92. pmid:  
448 21300392
- 449 4. Haase S, Sciocco-Cap A, Romanowski V. Baculovirus insecticides  
450 in Latin America: historical overview, current status and future  
451 perspectives. *Viruses*. 2015;7:2230-67. pmid: 25941826
- 452 5. Sánchez NE, Pereyra PC. Neotropical soybean budborer,  
453 *Crociosema aporema* (Walsingham, 1914) (Lepidoptera:  
454 Tortricidae). In J. L. Capinera (Ed.), *Encyclopedia of Entomology*.  
455 Dordrecht: Springer Netherlands. 2008. pp. 2587-2588. doi:  
456 [https://doi.org/10.1007/978-1-4020-6359-6\\_2186](https://doi.org/10.1007/978-1-4020-6359-6_2186)
- 457 6. Sciocco-Cap A, Parola AD, Goldberg AV, Ghiringhelli PD,  
458 Romanowski V. Characterization of a granulovirus isolated from  
459 *Epinotia aporema* Wals. (Lepidoptera: Tortricidae) larvae. *Appl*  
460 *Environ Microbiol*. 2001;67(8):3702-6. pmid: 11472950
- 461 7. Ferrelli ML, Salvador R, Biedma M, Berretta M, Haase S, Sciocco-  
462 Cap, A, et al. Genome of *Epinotia aporema* granulovirus (EpaGV),  
463 a polyorganotropic fast killing betabaculovirus with a novel  
464 thymidylate kinase gene. *BMC Genomics*. 2012;13(1):548. pmid:  
465 23051685
- 466 8. Greco TM, Diner BA, Cristea IM. The impact of mass spectrometry-  
467 based proteomics on fundamental discoveries in virology. *Annu*  
468 *Rev Virol*. 2014;1(1):581-604. pmid: 26958735
- 469 9. Nesvizhskii AI. Proteogenomics: concepts, applications and  
470 computational strategies. *Nat Methods*. 2014;11(11):1114-1125.  
471 pmid: 25357241
- 472 10. Tan Y, Bideshi DK, Johnson JJ, Bigot Y, Federici BA. Proteomic  
473 analysis of the *Spodoptera frugiperda* ascovirus 1a virion reveals  
474 21 proteins. *J Gen Virol*. 2009;90:359-365. pmid: 19141444
- 475 11. Vidick S, Leroy B, Palmeira L, Machiels B, Mast J, François S, et  
476 al. Proteomic characterization of murid herpesvirus 4 extracellular  
477 virions. *PLoS ONE*. 2013;8(12):e83842. pmid: 24386290
- 478 12. Ince IA, Boeren SA, Van Oers MM, Vervoort JJM, Vlak JM.  
479 Proteomic analysis of *Chilo iridescent* virus. *Virology*.  
480 2010;405(1):253-258. pmid: 20598335
- 481 13. Bézier A, Harichaux G, Musset K, Labas V, Herniou EA.  
482 Qualitative proteomic analysis of *Tipula oleracea* nudivirus  
483 occlusion bodies. *J Gen Virol*. 2017;98(2):284-295. pmid:  
484 28284235
- 485 14. Doellinger J, Schaade L, Nitsche A. Comparison of the Cowpox  
486 Virus and Vaccinia Virus mature virion proteome: analysis of the  
487 species- and strain-specific proteome. *PLOS ONE*.  
488 2015;10(11):e0141527. pmid: 26556597
- 489 15. Braunagel SC, Russell WK, Rosas-Acosta G, Russell DH,  
490 Summers MD. Determination of the protein composition of the  
491 occlusion-derived virus of *Autographa californica*  
492 nucleopolyhedrovirus. *Proc Natl Acad Sci USA*.

- 493 2003;100(17):9797-802. pmid: 12904572
- 494 16. Braconi CT, Ardisson-Araújo DM, Paes Leme AF, Oliveira JV,  
495 Pauletti BA, Garcia-Maruniak A, et al. Proteomic analyses of  
496 baculovirus *Anticarsia gemmatalis* multiple nucleopolyhedrovirus  
497 budded and occluded virus. *J Gen Virol.* 2014;95:980-989. pmid:  
498 24443474
- 499 17. Xu F, Ince IA, Boeren S, Vlak JM, Van Oers MM. Protein  
500 composition of the occlusion derived virus of *Chrysodeixis*  
501 *chalcites* nucleopolyhedrovirus. *Virus Res.* 2011;158(1-2):1-7.  
502 pmid: 21354223
- 503 18. Hou D, Zhang L, Deng F, Fang W, Wang R, Liu X, et al.  
504 Comparative proteomics reveal fundamental structural and  
505 functional differences between the two progeny phenotypes of a  
506 baculovirus. *J Virol.* 2013;87(2):829-39. pmid: 23115289
- 507 19. Hou D, Chen X, Zhang LK. Proteomic analysis of *Mamestra*  
508 *Brassicae* Nucleopolyhedrovirus progeny virions from two different  
509 hosts. *PLOS ONE.* 2016; 11(4):e0153365. pmid: 27058368
- 510 20. Zhang, X., Yin, X., Liang, Z., & Shao, X. Proteomic analysis of  
511 the occlusion-derived virus of *Clostera anachoreta* granulovirus. *J*  
512 *Gen Virol.* 2015;96(8):2394-2404. pmid: 25872743
- 513 21. Wang XF, Zhang BQ, Xu HJ, Cui YJ, Xu YP, Zhang MJ, et al. ODV-  
514 associated proteins of the *Pieris rapae* granulovirus. *J Proteome*  
515 *Res.* 2011;10(6):2817-2827. pmid: 21517121
- 516 22. Perera O, Green TB, Stevens SM Jr, White S, Becnel JJ. Proteins  
517 associated with *Culex nigripalpus* nucleopolyhedrovirus occluded  
518 virions. *J Virol.* 2007;81(9):4585-90. pmid: 17301145
- 519 23. Bradford MM. A rapid and sensitive method for the quantitation  
520 of microgram quantities of protein utilizing the principle of  
521 protein-dye binding. *Anal. Biochem.* 1976;72(1-2):248-54. pmid:  
522 942051
- 523 24. Altschul SF, Gish W, Miller W, Myers EW, Lipman DJ. Basic local  
524 alignment search tool. *J. Mol. Biol.* 1990;215(3):403-410. pmid:  
525 2231712
- 526 25. Eddy SR. Accelerated Profile HMM Searches. *PLoS Comput Biol.*  
527 2011;7(10):e1002195. pmid: 22039361
- 528 26. Ishihama Y, Oda Y, Tabata T, Sato T, Nagasu T, Rappsilber J, et  
529 al. Exponentially modified protein abundance index (emPAI) for  
530 estimation of absolute protein amount in proteomics by the  
531 number of sequenced peptides per protein. *Mol Cell Proteomics.*  
532 2005;4(9):1265-1272. pmid: 15958392
- 533 27. McCarthy CB, Theilmann DA. AcMNPV ac143 (odv-e18) is  
534 essential for mediating budded virus production and is the 30th  
535 baculovirus core gene. *Virology.* 2008;375(1):277-291. pmid:  
536 18328526
- 537 28. Kang M, Duncan GA, Kuszynski C, Oyler G, Zheng J, Becker DF,  
538 et al. Chlorovirus PBCV-1 encodes an active copper-zinc  
539 superoxide dismutase. *J Virol.* 2014;88(21):12541-12550. pmid:  
540 25142578
- 541 29. Javed MA, Biswas S, Willis LG, Harris S, Pritchard C, van Oers  
542 MM, et al. *Autographa californica* multiple nucleopolyhedrovirus  
543 AC83 is a per os infectivity factor (PIF) protein required for  
544 occlusion-derived virus (ODV) and budded virus nucleocapsid  
545 assembly as well as assembly of the PIF complex in ODV  
546 envelopes. *J Virol.* 2017;91(5):e02115-16. pmid: 28031365
- 547 30. Zhu Z, Yin F, Liu X, Hou D, Wang J, Zhang L, et al. Genome

- 548 sequence and analysis of Buzura suppressaria  
549 nucleopolyhedrovirus: a group II Alphabaculovirus. PloS One.  
550 2014;9(1):e86450. pmid: 24475121
- 551 31. Biswas S, Willis LG, Fang M, Nie Y, Theilmann DA. Autographa  
552 californica nucleopolyhedrovirus AC141 (Exon0), a potential E3  
553 ubiquitin ligase, interacts with viral ubiquitin and AC66 to facilitate  
554 nucleocapsid egress. J Virol. 2018;92(3):e01713-17 pmid:  
555 29142135
- 556 32. Shi A, Hu Z, Zuo Y, Wang Y, Wu W, Yuan M, et al. Autographa  
557 californica nucleopolyhedrovirus ac75 is required for the nuclear  
558 egress of nucleocapsids and intranuclear microvesicle formation.  
559 Journal of Virology. 2017;92(4):e01509-17. pmid: 29212928
- 560 33. Yuan M, Huang Z, Wei D, Hu Z, Yang K, Pang Y. Identification of  
561 Autographa californica nucleopolyhedrovirus ac93 as a core gene  
562 and its requirement for intranuclear microvesicle formation and  
563 nuclear egress of nucleocapsids. J Virol. 2011;85(22):11664-74.  
564 pmid: 21880748
- 565 34. Tao XY, Choi JY, Kim WJ, Lee JH, Liu Q, Kim SE, et al. The  
566 Autographa californica multiple nucleopolyhedrovirus ORF78 is  
567 essential for budded virus production and general occlusion body  
568 formation. J Virol. 2013;87(15):8441-8450. pmid: 23698311
- 569 35. Dong F, Wang J, Deng R, Wang X. Autographa californica  
570 multiple nucleopolyhedrovirus gene ac81 is required for  
571 nucleocapsid envelopment. Virus Res. 2016;221:47-57. pmid:  
572 27212683
- 573 36. McCarthy CB, Dai X, Donly C, Theilmann DA. Autographa  
574 californica multiple nucleopolyhedrovirus ac142, a core gene that  
575 is essential for BV production and ODV envelopment. Virology.  
576 2008;372(2):325-339. pmid: 18045640
- 577 37. Chen L, Hu X, Xiang X, Yu S, Yang R, Wu X. Autographa  
578 californica multiple nucleopolyhedrovirus odv-e25 (Ac94) is  
579 required for budded virus infectivity and occlusion-derived virus  
580 formation. Arch Virol. 2012;157(4):617-625. pmid: 22218963
- 581 38. Alfonso V, Maroniche GA, Reca SR, López MG, del Vas M,  
582 Taboga O. AcMNPV Core gene ac109 is required for budded virion  
583 transport to the nucleus and for occlusion of viral Prpgeny. PLoS  
584 ONE. 2012;7(9):e46146. pmid: 23049963
- 585 39. Wu W, Passarelli AL. Autographa californica multiple  
586 nucleopolyhedrovirus Ac92 (ORF92, P33) is required for budded  
587 virus production and multiply enveloped occlusion-derived virus  
588 formation. J Virol. 2010;84(23):12351-61. pmid: 20861245
- 589 40. Yuan M, Wu W, Liu C, Wang Y, Hu Z, Yang K, et al. A highly  
590 conserved baculovirus gene p48 (ac103) is essential for BV  
591 production and ODV envelopment. Virology. 2008;379(1):87-96.  
592 pmid: 18656219
- 593 41. Boogaard B, van Oers MM, van Lent JWM. An advanced view on  
594 baculovirus per os infectivity factors. Insects. 2018;9(3):E84 pmid:  
595 30018247
- 596 42. Moldován N, Tombácz D, Szűcs A, Csabai Z, Balázs Z, Kis E, et  
597 al. Third-generation sequencing reveals extensive polycistronism  
598 and transcriptional overlapping in a baculovirus. Sci. Rep.  
599 2018;8(1):8604. pmid: 29872099
- 600 43. Leroy B, Gillet L, Vanderplasschen A, Wattiez R. Structural  
601 proteomics of herpesviruses. Viruses. 2016;8(2):50. pmid:  
602 26907323

- 603 44. Brito AF, Braconi CT, Weidmann M, Dilcher M, Alves JMP, Gruber  
604 A, et al. The Pangenome of the Anticarsia gemmatalis Multiple  
605 Nucleopolyhedrovirus (AgMNPV). *Genome Biol Evol.* 2015;8(1):94-  
606 108. pmid: 26615220
- 607 45. Escasa SR, Lauzon HAM, Mathur AC, Krell PJ, Arif BM. Sequence  
608 analysis of the Choristoneura occidentalis granulovirus genome. *J*  
609 *Gen Virol.* 2006;87(7):1917-33. pmid:16760394.
- 610 46. Harrison RL, Popham HJR. Genomic sequence analysis of a  
611 granulovirus isolated from the Old World bollworm, *Helicoverpa*  
612 *armigera*. *Virus Genes.* 2008;36(3):565-81. pmid:18418706.  
613

614 **Fig 1. Genomic localization of ORFs coding for proteins found**  
615 **in EpapGV OBs**

616 Proteins identified from spectral data (green arrows) were mapped to  
617 their respective genomic coordinate (grey line). The novel identified  
618 Ac110-like peptide is highlighted in red script. The baculovirus  
619 collinearity region is shown in black.

620 **Fig 2. Putative fusion protein Epap48-Epap49**

621 (A) Genomic locus containing *epap48* (green) and *epap49* (blue)  
622 genes. The two peptides detected by MS inside the intergenic region  
623 are depicted in purple. (B) Genome sequence and translation frame  
624 for each gene. Start and stop codons are shown in red (nucleotide  
625 numbers are those from NCBI accession number NC\_018875).

626 **Fig 3. Baculovirus proteome comparison.** (A) Protein  
627 conservation in baculovirus occluded virion proteomes. Protein  
628 orthogroups derived from proteomics datasets were scored according  
629 to the number of proteomes in which they were detected. Gene class  
630 distribution (core genes, lepidopteran baculovirus-specific, genus-  
631 specific, specie-specific) of orthologs groups within *Baculoviridae* is  
632 highlighted in different colours. (B) Proteins detected in proteomes of  
633 betabaculoviruses were grouped in sets of orthologs and represented  
634 using a Venn diagram. A set of 34 proteins is present in all three  
635 viruses [20, 21, this study]; core gene products are highlighted in  
636 bold. Two of these protein clusters being specific of *Betabaculovirus*  
637 (Epap48 and Epap95).

638 **Fig 4. Schematic model of EpapGV OB.** Qualitative and semi-  
639 quantitative virion model based on our proteomic data and  
640 localization described in published reports. Protein levels were  
641 estimated using the emPAI value and expressed as relative value with

642 respect to the major capsid protein VP39.



644



645



646



## 647 **Supplementary information**

648 **S1 Appendix.** EpapGV unannotated peptides detected by MS.

649 **S1 Figure.** Parity plot of sequences coding for structural proteins

650 present in AcMNPV, ChchNPV and PiraGV against EpapGV.

651 **S1 Table.** Proteomic profiles of baculovirus occluded virions

652 proteomes.
